# Supplementary material for: Untargeted metabolomics reveals transformation pathways and metabolic response of the earthworm Perionyx excavatus after exposure to triphenyl phosphate
Source: PubMed Central journal article supplement (PMC6219545; doi:10.1038/s41598-018-34814-9), 2018-11-06
Supplement: 41598_2018_34814_MOESM1_ESM.pdf [file 41598_2018_34814_MOESM1_ESM.pdf]

## Supplementary Information

### Untargeted metabolomics reveals transformation pathways and metabolic responses of the earthworm *Perionyx excavatus* after exposure to triphenyl phosphate

Lei Wang<sup>1</sup>, Xulei Huang<sup>1</sup>, Anna Karen Carrasco Laserna<sup>1</sup> and Sam Fong Yau Li<sup>1,2,\*</sup>

<sup>1</sup>Department of Chemistry, National University of Singapore, 3 Science Drive 3, Singapore.

<sup>2</sup>NUS Environmental Research Institute (NERI), #02-01, T-Lab Building (TL), 5A Engineering Drive 1, Singapore 117411, Singapore.

\*Correspondence and requests for materials should be addressed to S.F.Y. Li. (email: [chmlifys@nus.edu.sg](mailto:chmlifys@nus.edu.sg))

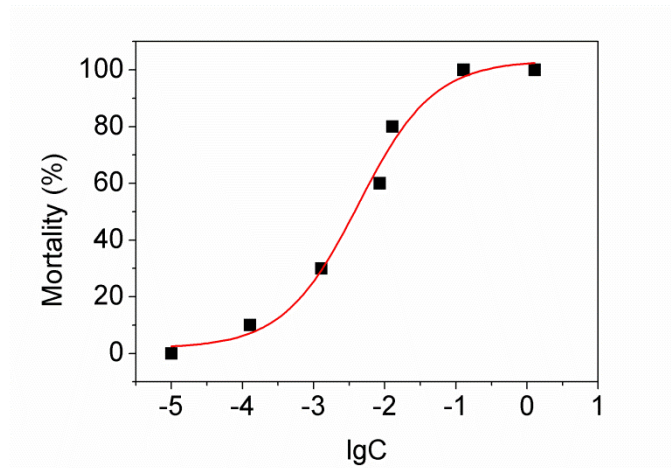

Supplementary Figure S1 Earthworm mortalities after dermal exposure for 48 h to filter papers with a series of TPHP concentrations. C: concentrations expressed as  $\mu\text{g}$  TPHP per  $\text{cm}^2$  filter paper.

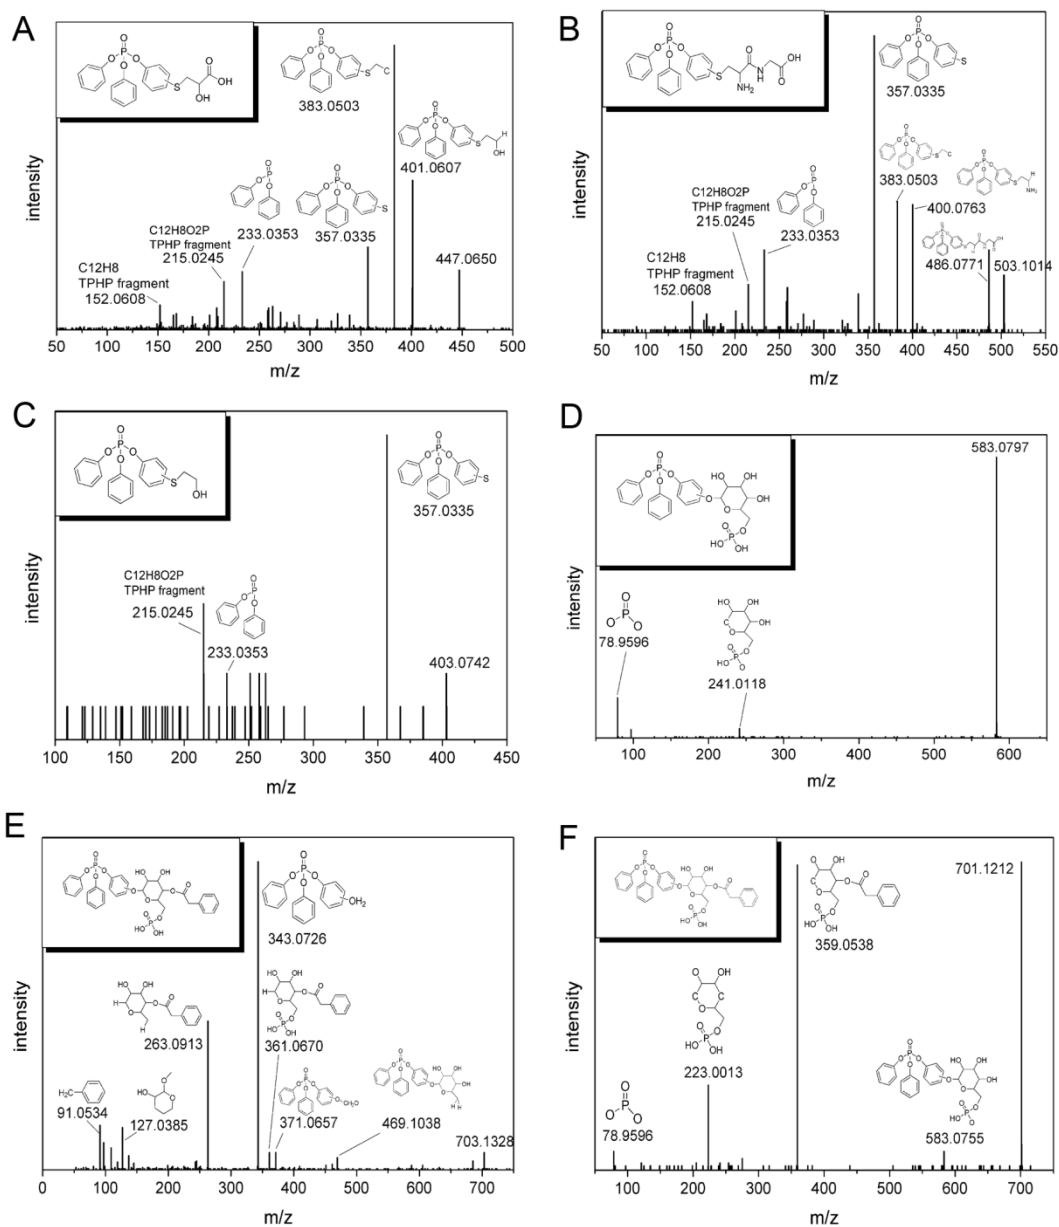

Supplementary Figure S2 MS/MS spectrum of (A) mercaptolactic acid-TPHP ( $m/z$  447.0658 in ESI+), (B) cysteinylglycine-TPHP ( $m/z$  503.1014 in ESI+), (C) mercaptoethanol-TPHP ( $m/z$  403.0742 in ESI+), (D) phosphate-glucoside-TPHP ( $m/z$  583.0797 in ESI-), and C<sub>14</sub>H<sub>19</sub>O<sub>10</sub>P-TPHP [(E)  $m/z$  703.1316 in ESI+ and (F)  $m/z$  701.1212 in ESI-] with annotation of the putative fragments.

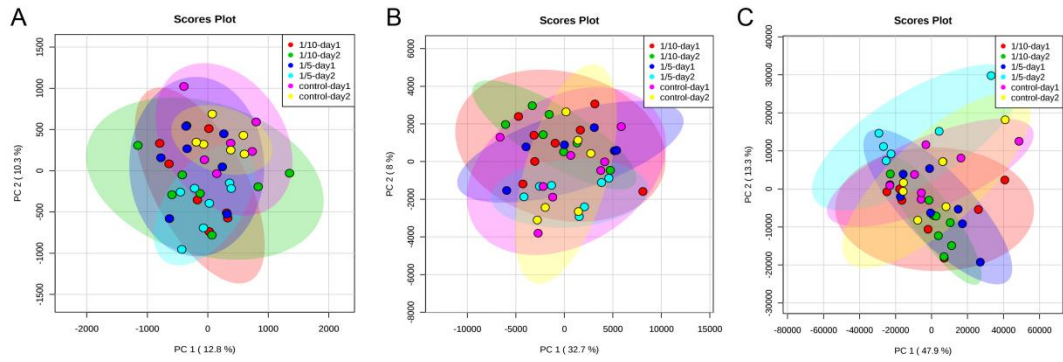

Supplementary Figure S3 Principal component analysis of extracted features from LC-QTOF spectra in (A) positive mode and (B) negative mode, and from (C) GC-MS spectra after acute exposure. The labels 1/10 and 1/5 refer to 1/10 LC50 and 1/5 LC50 exposure groups, respectively.

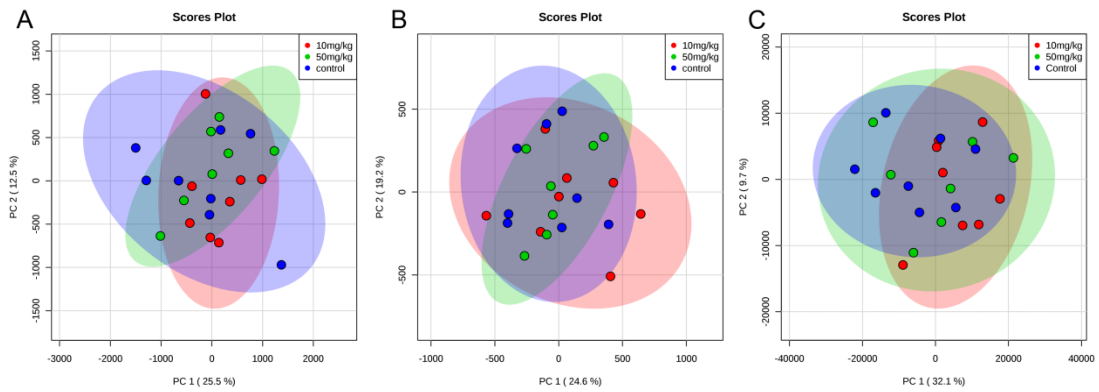

Supplementary Figure S4 Principal component analysis of extracted features from LC-QTOF spectra in (A) positive mode and (B) negative mode, and from (C) GC-MS spectra after chronic exposure.

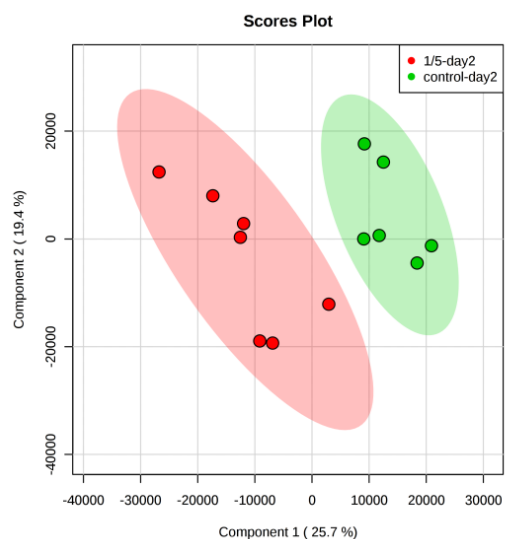

Supplementary Figure S5 Score plot of partial least squares discriminant analysis of GC-MS data (Control-day 2 versus 1/5 LC<sub>50</sub>-day2) after probabilistic quotient normalization.
